# Supplementary material for: Generation of Stable Epithelial–Mesenchymal Hybrid Cancer Cells with Tumorigenic Potential
Source: MDPI journal article supplement (doi:10.3390/cancers15030684), 2023-01-22
Supplement: s1 [file s1]

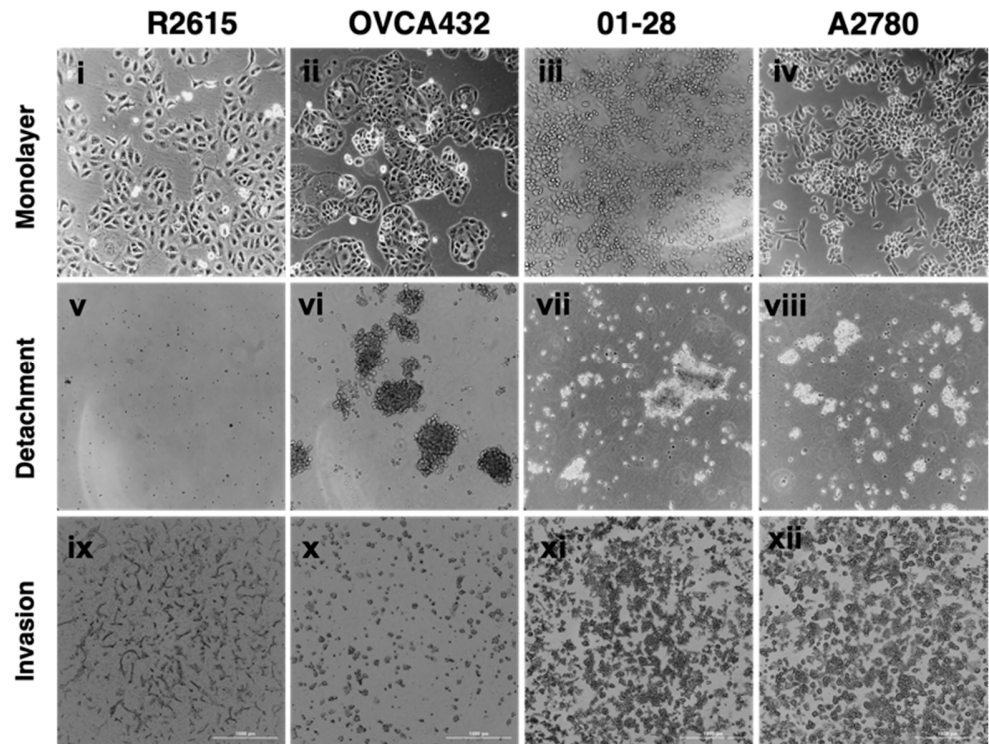

**Supplementary Figure S1.** Characterization of the epithelial–mesenchymal biological phenotypes in ovarian cancer cell lines. Cellular images shown as (i–iv) monolayer. The EMT biological phenotype characterizations were conducted by (v–viii) anoikis, and (ix–xii) invasion assays. The ovarian cancer cell lines shown are (i, v, ix) R2615, (ii, vi, x) OVCA432, (iii, vii, xi) 01-28, and (iv, viii, xii) A2780.

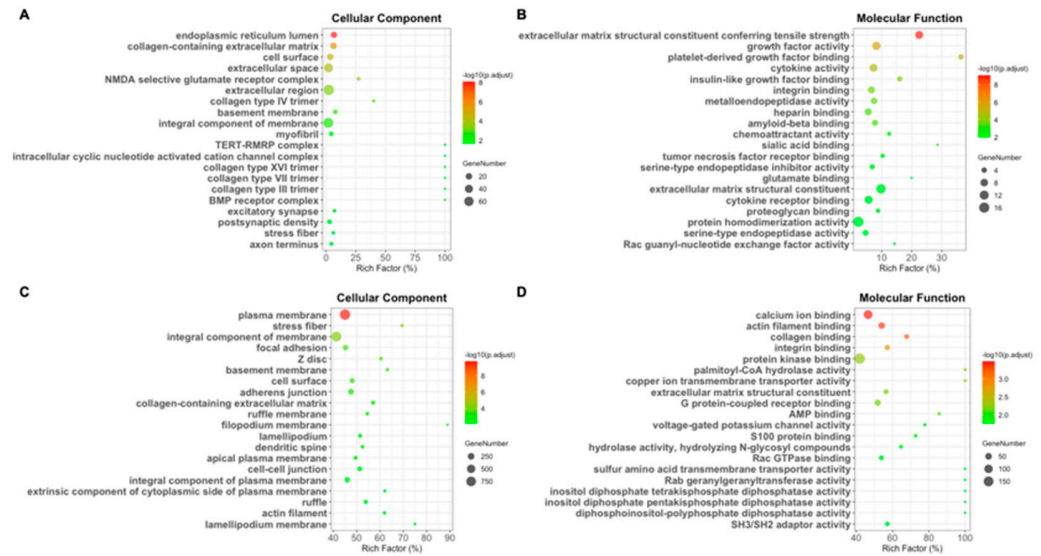

**Supplementary Figure S2.** GO enrichment analysis of the E/M hybrid state and mesenchymal cells. (A) Top 20 significant GO enrichment terms for cellular components in the E/M hybrid compared to the epithelial cells. (B) Top 20 significant GO enrichment terms for molecular functions in the E/M hybrid compared to the epithelial cells. (C) Top 20 significant GO enrichment terms for cellular components in the mesenchymal-to-epithelial cells. (D) Top 20 significant GO enrichment terms for molecular functions in the mesenchymal-to-epithelial cells.

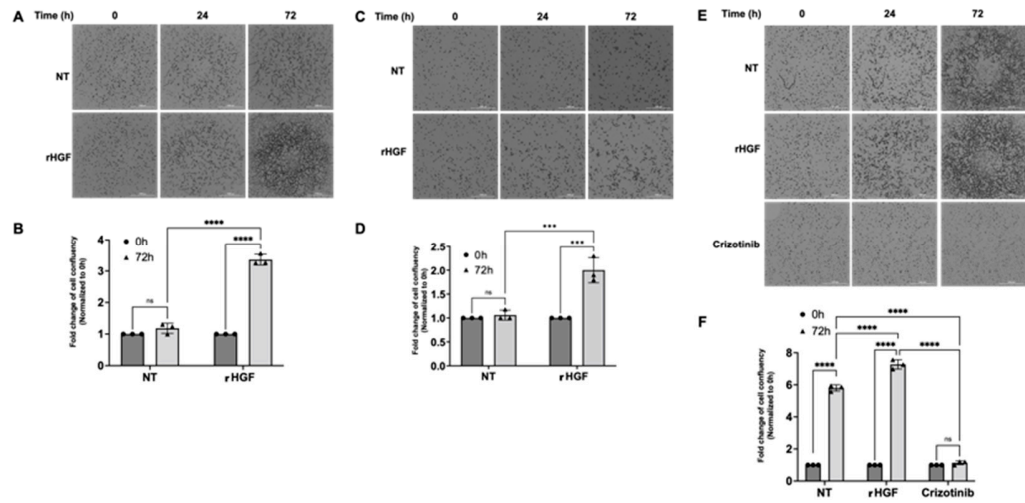

**Supplementary Figure S3.** Characterization of the effect of HGF on the invasion capacity of R2615, OVCA432, and OVCA433. (A) Invasion assay of R2615 (i) 0, (ii) 24, and (iii) 72 h timepoints in the presence or absence of 80 ng/mL rHGF. (B) Quantification of the R2615 invasion assay presented as the fold change of cell confluency normalized to cells in 0 h (time of seeding). Bars represent the means  $\pm$  SEM; p-value \*\*\*\* $<0.0001$ , n.s. = non-significant. Two-way ANOVA was used to define the p-value. (C) Invasion assay of OVCA432 (i) 0, (ii) 24, and (iii) 72 h timepoints in the presence or absence of 80 ng/mL rHGF. (D) Quantification of the OVCA432 invasion assay presented as the fold change of cell confluency normalized to cells in 0 h (time of seeding). Bars represent the means  $\pm$  SEM; p-value \*\*\* $<0.001$ , n.s. = non-significant. Two-way ANOVA was used to define the p-value. (E) Invasion assay of OVCA433 (i) 0, (ii) 24, and (iii) 72 h timepoints in either the presence or absence of 80 ng/mL rHGF or the addition of c-MET inhibitor, 100 nM Crizotinib. (F) Quantification of the OVCA433 invasion assay presented as the fold change of cell confluency normalized to cells in 0 h (time of seeding). Bars represent the means  $\pm$  SEM; p-value \*\*\*\* $<0.0001$ , n.s. = non-significant. Two-way ANOVA was used to define the p-value.

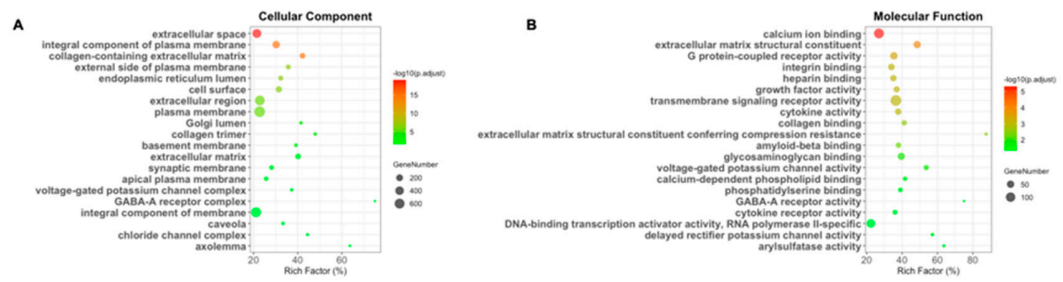

**Supplementary Figure S4.** GO enrichment analysis of the HGF-educated E/M hybrid state. **(A)** Top 20 significant GO enrichment terms for cellular components in HGR182 compared to R182. **(B)** Top 20 significant GO enrichment terms for molecular functions in HGR182 compared to R182.
