# Supplementary material for: Generation of Stable Epithelial–Mesenchymal Hybrid Cancer Cells with Tumorigenic Potential
Source: MDPI journal article supplement (doi:10.3390/cancers15030684), 2023-01-22
Supplement: s1 [file s1]

**Supplementary Table S2. Primers used for qRT-PCR analyses.**

| <b>Gene</b>   | <b>Forward (5'-3')</b>      | <b>Reverse (5'-3')</b>   |
|---------------|-----------------------------|--------------------------|
| <i>HGF</i>    | ACGCTACGAAGTCTGTGA          | AAGAATTTGTGCCGGTGT       |
| <i>TNC</i>    | TCTTGAAGGCAGGCGCAAAC        | CCAAATGCCCAGGTGTGGACCGAT |
| <i>VIM</i>    | ATTCCACTTTGCGTTCAAGG        | CTTCAGAGAGAGGAAGCCGA     |
| <i>KRT18</i>  | AAATCCGGGAGCACTTGGAG        | CAATCTGCAGAACGATGCGG     |
| <i>EPCAM</i>  | GTGCTGGTGTGTGAACACTG        | GAAGTGCAGTCCGCAAACCTT    |
| <i>SOX2</i>   | AGCTACAGCATGATGCAGGA        | GGTCATGGAGTTGTACTGCA     |
| <i>ZO1</i>    | CAGAACCAAAGCCTGTGTATG       | TTAGGTAGGACACCATCAGATGGA |
| <i>TWIST1</i> | GTCATGGCCAACGTGCGGGA        | GCCGCCAGCTTGAGGGTCTG     |
| <i>MMP1</i>   | CAGAGATGAAGTCCGGTTTTTC      | GGGGTATCCGTGTAGCACAT     |
| <i>MMP3</i>   | AAATCCTGATCTTTAAAGACAGGCACT | GAGATCAAATGCAATTCAGGTTCA |
| <i>COL6A3</i> | GAGCAGCTTGACAACATTGCC       | GCCCAGAGCACTTGCAGG       |
| <i>COL4A1</i> | CCGGATCACATTGACATGAAACC     | TGGAAACCAGTCCATGCTCG     |

|              |                      |                      |
|--------------|----------------------|----------------------|
| <i>c-MET</i> | TGAGAAGGCTAAAGGAAA   | TCAAAGGCATGGACATAC   |
| <i>VAV3</i>  | ACCAATGGACTGCGAAGAAC | GCTTGACTGCATCACTTGGA |
| <i>GAPDH</i> | TGACGCTGGGGCTGGCATT  | GGCTGGTGGTCCAGGGGT   |
