# Supplementary material for: Generation of Stable Epithelial–Mesenchymal Hybrid Cancer Cells with Tumorigenic Potential
Source: MDPI journal article supplement (doi:10.3390/cancers15030684), 2023-01-22
Supplement: s1 [file s1]

**Supplementary Table S1. Antibodies used for western blot analyses.**

| <b>Antibodies</b>      | <b>Dilution</b> | <b>Catalog no. &amp; Manufacturer</b>          |
|------------------------|-----------------|------------------------------------------------|
| Anti-Twist1            | 1:500           | CS-81417, Santa Cruz Biotechnology, Dallas, TX |
| Anti- SOX2             | 1:1000          | 3579, Cell Signaling Technology, Danvers, MA   |
| Anti- $\beta$ -catenin | 1:1000          | 8480, Cell Signaling Technology, Danvers, MA   |
| Anti-E-cadherin        | 1:1000          | 14472, Cell Signaling Technology, Danvers, MA  |
| Anti-Claudin3          | 1:1000          | 83609, Cell Signaling Technology, Danvers, MA  |
| Anti-N-cadherin        | 1:1000          | 13116, Cell Signaling Technology, Danvers, MA  |
| Anti-Vimentin          | 1:1000          | 5741, Cell Signaling Technology, Danvers, MA   |
| Anti-Slug              | 1:1000          | 9585, Cell Signaling Technology, Danvers, MA   |
| anti-phospho-c-MET     | 1:1000          | 3077, Cell Signaling Technology, Danvers, MA   |
| anti-c-MET             | 1:1000          | 8198, Cell Signaling Technology, Danvers, MA   |
| anti-phospho-ERK1/2    | 1:1000          | 4370, Cell Signaling Technology, Danvers, MA   |

|                                              |         |                                               |
|----------------------------------------------|---------|-----------------------------------------------|
| anti-ERK1/2                                  | 1:1000  | 9102, Cell Signaling Technology, Danvers, MA  |
| anti-tenascin-C                              | 1:1000  | 33352, Cell Signaling Technology, Danvers, MA |
| anti-GAPDH                                   | 1:10000 | G8795, Sigma, St. Louis, MO                   |
| peroxidase-<br>conjugated<br>anti-rabbit IgG | 1:10000 | Dako, Glostrup, Denmark                       |
| peroxidase-<br>conjugated<br>anti-mouse IgG  | 1:10000 | Dako, Glostrup, Denmark                       |
